# Supplementary material for: Tracking Dietary Patterns over 20 Years from Childhood through Adolescence into Young Adulthood: The Saskatchewan Pediatric Bone Mineral Accrual Study
Source: MDPI journal article supplement (doi:10.3390/nu9090990), 2017-09-08
Supplement: s1 [file s1]

# Supplementary File:

**Table S1.** Comparison of mean baseline total energy intake and five food groups intakes between included and excluded participants in dietary pattern analysis. <sup>1</sup>

|                                     | Included Participants<br>( <i>n</i> = 130) | Excluded Participants<br>( <i>n</i> = 108) | <i>p</i> Value <sup>2</sup> |
|-------------------------------------|--------------------------------------------|--------------------------------------------|-----------------------------|
| Milk and alternatives (Serving/day) | 2.9 ± 1.3                                  | 2.5 ± 1.4                                  | 0.052                       |
| Fruit and vegetables (Serving/day)  | 3.8 ± 2.2                                  | 3.8 ± 2.3                                  | 0.811                       |
| Meat and alternatives (Serving/day) | 1.9 ± 1.0                                  | 1.8 ± 1.1                                  | 0.401                       |
| Fat and oil (Serving/day)           | 3.6 ± 2.0                                  | 4.1 ± 3.4                                  | 0.153                       |
| Sweets and desserts (Serving/day)   | 3.1 ± 2.0                                  | 2.8 ± 2.0                                  | 0.241                       |
| Energy intake (kJ)                  | 7761 ± 2060                                | 7458 ± 2771                                | 0.336                       |

<sup>1</sup> Values are mean ± SD. <sup>2</sup> MANOVA with Bonferroni adjustment for multiple comparisons for baseline dietary intake data of participants.

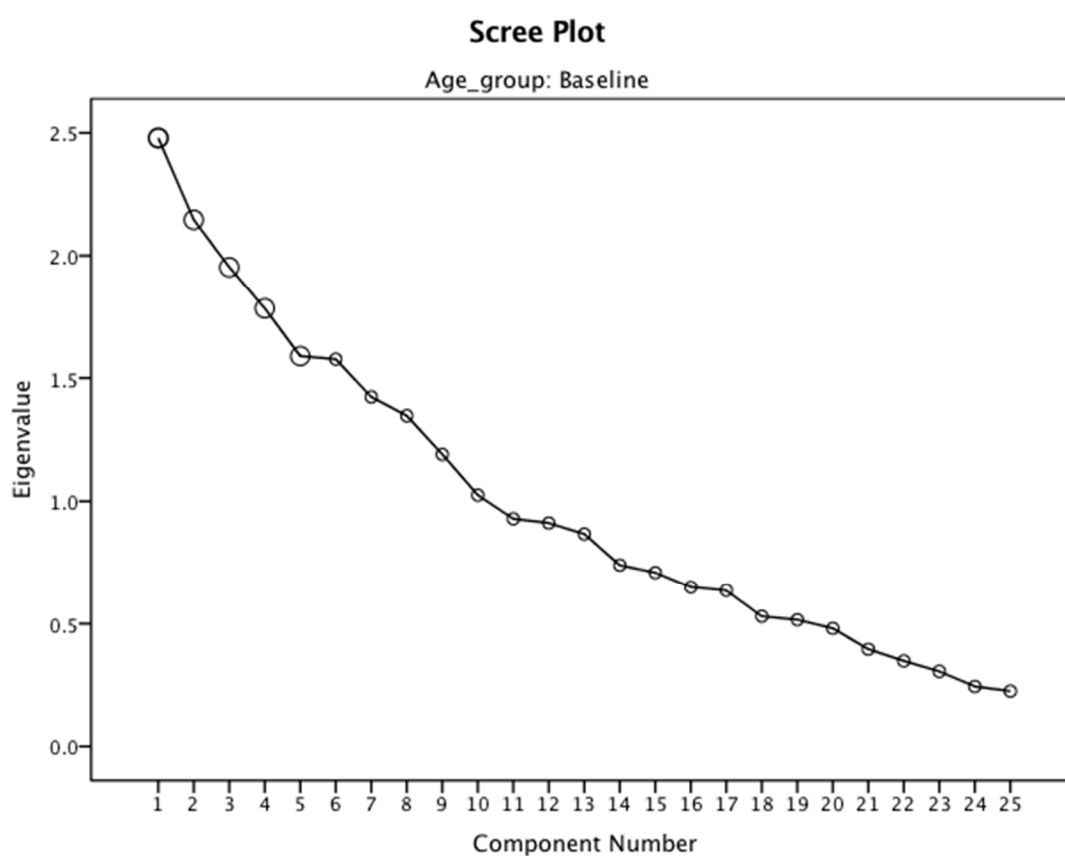

**Figure S1.** Scree plot obtained using principal component analysis of 25 food groups to derive dietary patterns of PBMAS participants at baseline.
